# Supplementary material
Source: publisher figshare collection journal article supplement (https://plos.figshare.com/articles/dataset/_/1088620)
Supplement: Supplementary file 1 [file 1]

Archive with 10 entries (10 files):
- Figure_S1.pdf
- Figure_S2.pdf
- Figure_S3.pdf
- Table_S1.doc
- Table_S2.doc
- Table_S3.doc
- Table_S4.doc
- Table_S5.doc
- Dataset_S1.zip
- Dataset_S2.zip
