# Supplementary material
Source: publisher figshare collection journal article supplement (https://plos.figshare.com/articles/dataset/_/1088620)

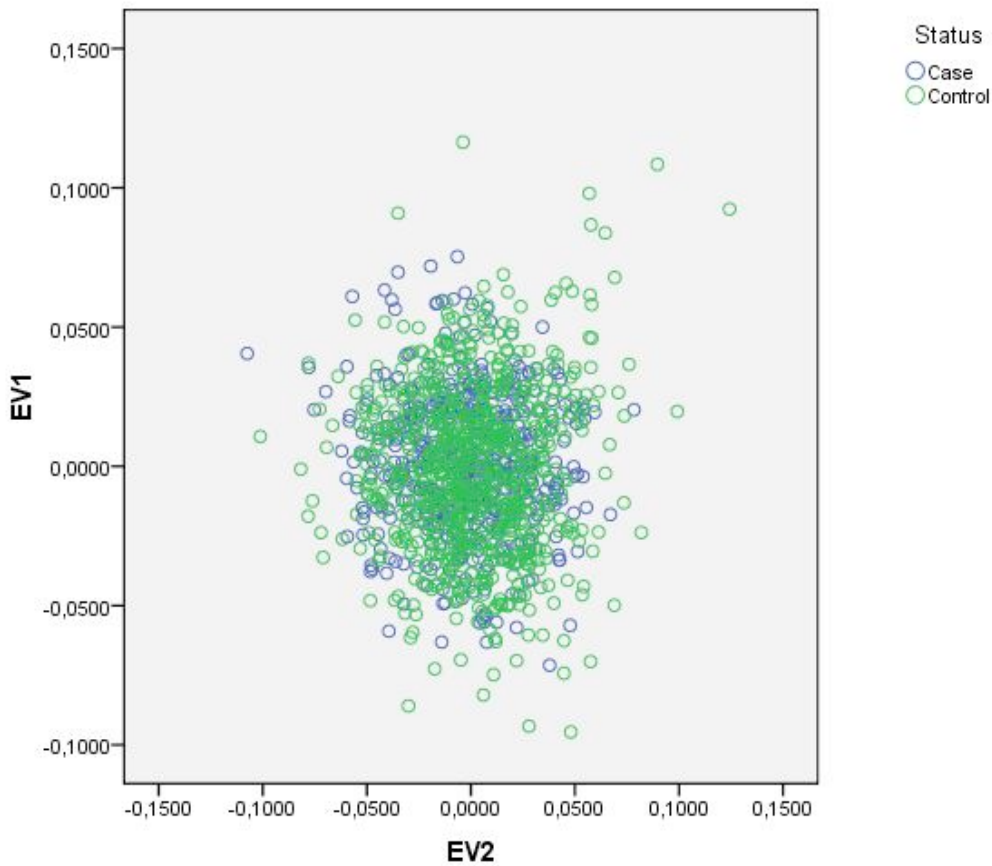

Supplement: Supplementary file 1 [file 1 › Figure_S1.pdf]

Chi-square Q-Q Plot of A2

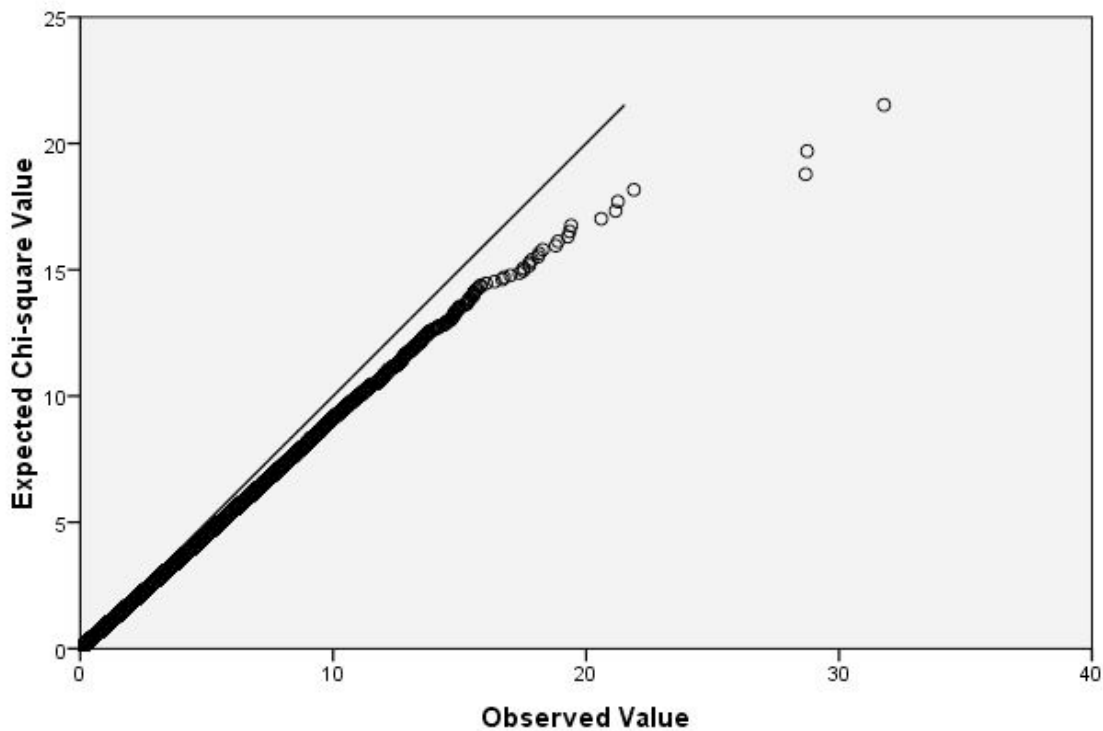

Supplement: Supplementary file 1 [file 1 › Figure_S2.pdf]

# NXC-GWAS OR vs Reported OR

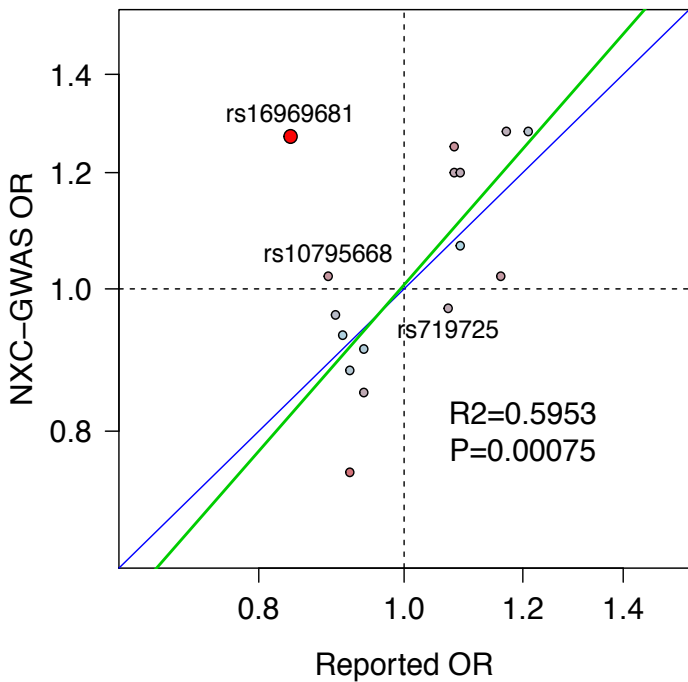

Supplement: Supplementary file 1 [file 1 › Figure_S3.pdf]
